# Supplementary material for: Genomes and population genomics of Cenococcum geophilum highlight the genetic diversity, evolution, and stress responses of ectomycorrhizal fungi
Source: Research Square preprint supplement (doi:10.21203/rs.3.rs-4894562/v1), 2024-09-06
Supplement: Supplementary file 1 [file 88bb7093e8a092741d25250b.xlsx]

## Sheet: Table 1
Table 1 | Summary statistics of the 5 assembled Cenococcum geophilumgenomes
		Sample	Assembled genome size (bp)	Contig Number (n)	Contig N50 (bp)	Contig N90 (bp)	GC content (%)	Repetitive sequences(%)	Gene number (n)	Annotated genes (n)	Gene length (bp)	Completeness (BUSCO,%)
		ChCg030	178575044	98	31501269	25635741	37.92	75.96	11811	11482	27439338	93.79
		JaCg010	117087688	10	15880244	9878759	38.17	62.64	11532	11216	26927934	92.41
		JaCg057	114163363	23	16550244	11024969	38.59	64.66	11483	11130	26351133	93.79
		ChCg001	157182892	251	7136722	1143664	38.2	70.34	12972	11323	29398215	93.45
		ThCg006	230176677	120	20225723	5124560	38.44	84.46	11349	11037	26087546	94.48
